# Supplementary material for: Vitamin D treatment attenuates 2,4,6-trinitrobenzene sulphonic acid (TNBS)-induced colitis but not oxazolone-induced colitis
Source: PubMed Central journal article supplement (PMC5020649; doi:10.1038/srep32889), 2016-09-13

**Vitamin D treatment attenuates 2,4,6-trinitrobenzene sulphonic acid  
(TNBS)-induced colitis but not oxazolone-induced colitis**

Tianjing Liu, Yongyan Shi, Jie Du, Xin Ge, Xu Teng, Lu Liu, Enbo Wang and Qun Zhao

## **Pathogens excluded in SPF**

According to the laboratory animal-Microbiological standards and monitoring instructions (GB 14922.2-2011), the following organisms were excluded under SPF status in our lab:

*Salmonella* spp.

*Yersinia pseudotuberculosis*

*Yersinia enterocolitica*

Pathogenic dermal fungi

*Streptobacillus moniliformis*

*Bordetella bronchiseptica*

*Mycoplasma* spp.

*Corynebacterium kutscheri*

Tyzzler's organism

O115 a, C,K(B)*Escherichia coli* O115 a, C,K(B)

*Pasteurella pneumotropica*

*Klebsiella pneumoniae*

*Staphylococcus aureus*

$\beta$ -hemolytic streptococcus

*Pseudomonas aeruginosa*

Uncut gels

Fig 3C

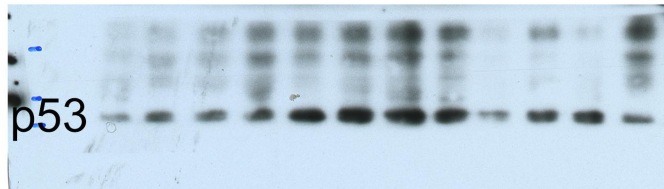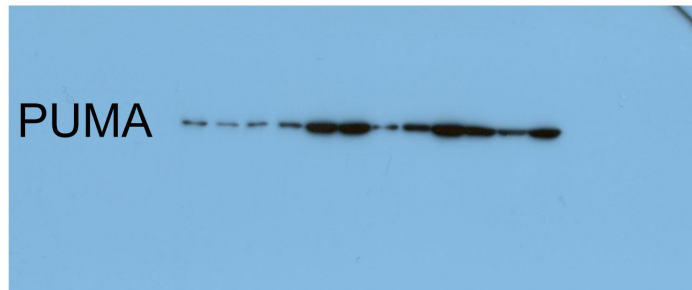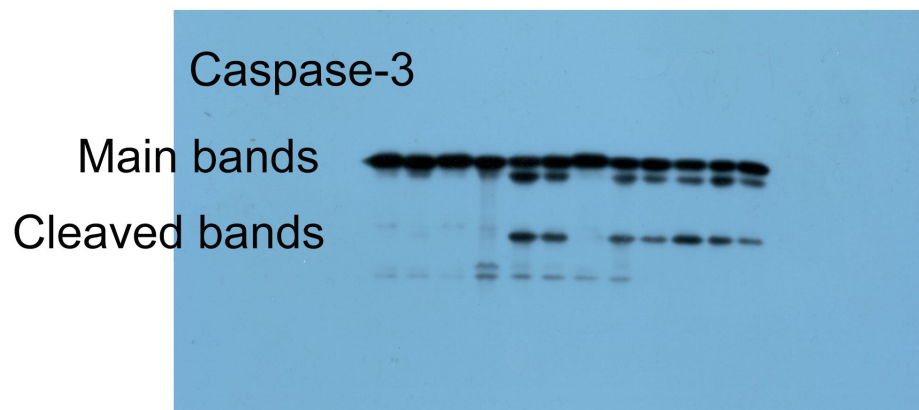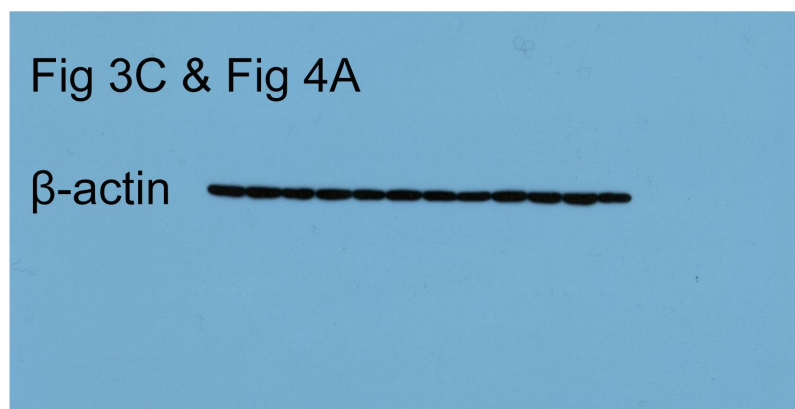

Fig 4A

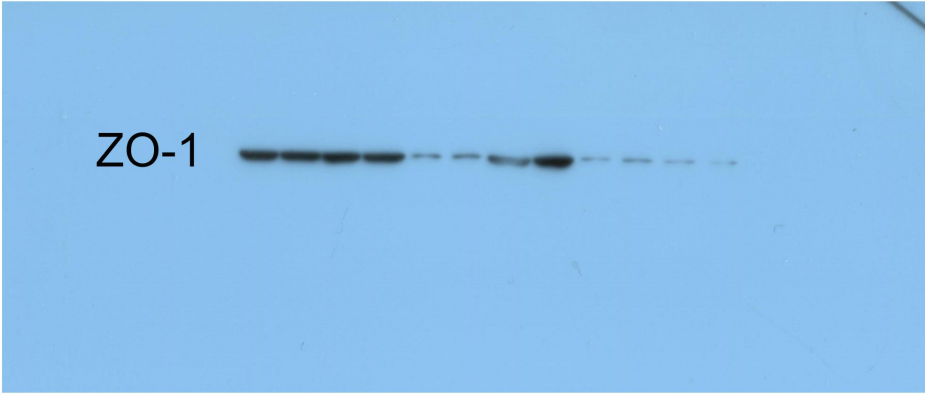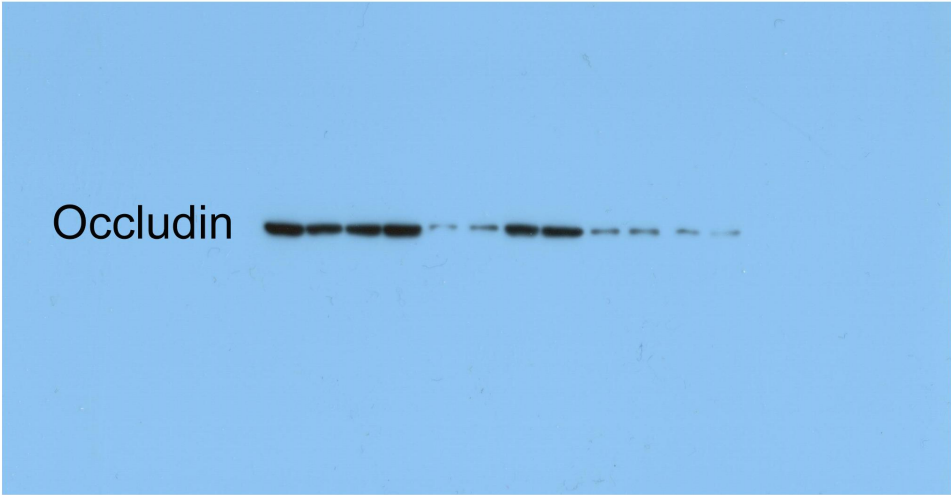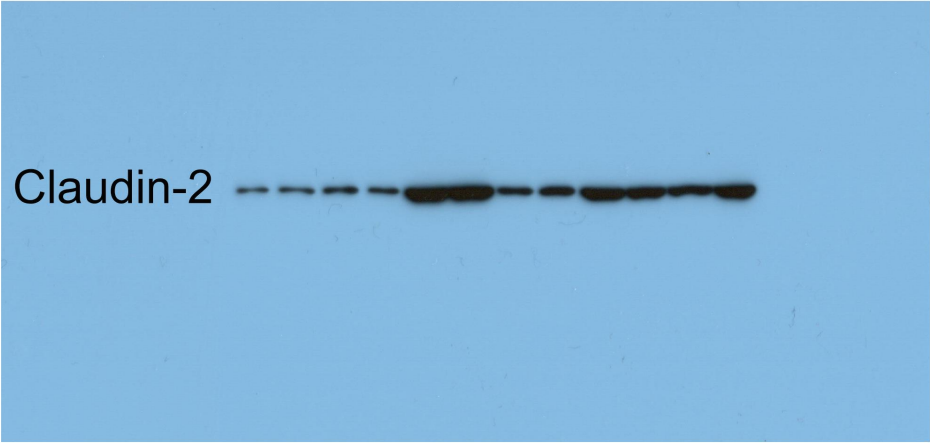

Fig 6A

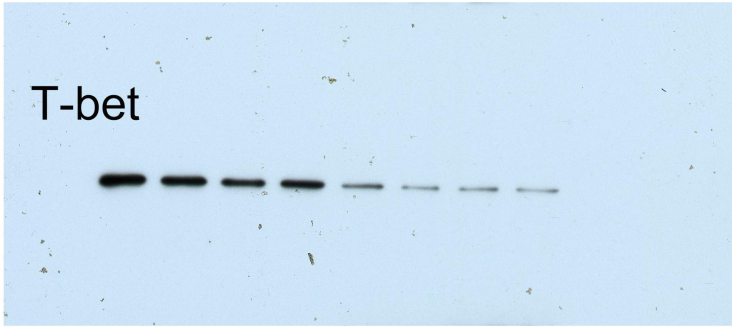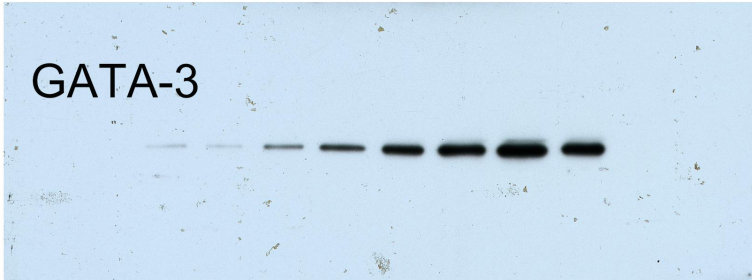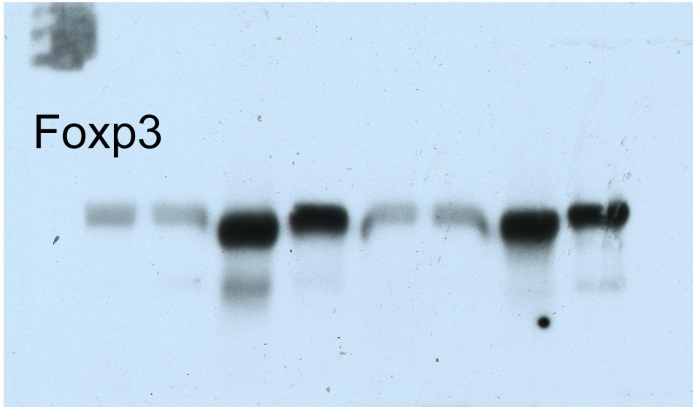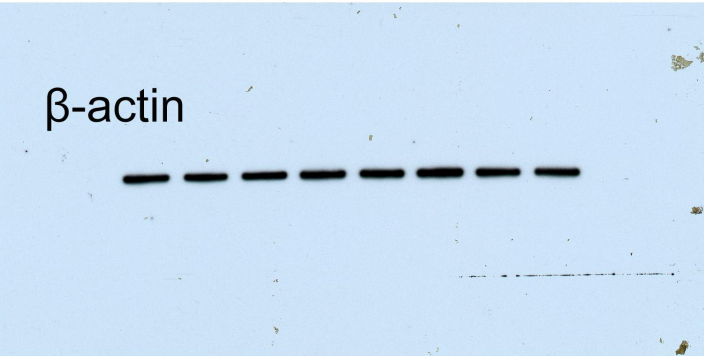

Supplement: srep32889-s1.pdf [file srep32889-s1.pdf]
